# Supplementary material for: Enhanced catalytic application of Au@polyphenol-metal nanocomposites synthesized by a facile and green method
Source: Royal Society of Chemistry journal article supplement (doi:10.1039/c4ta02831g), 2014-07-15
Supplement: c4ta02831g1.pdf [file c4ta02831g1.pdf]

Enhanced catalytic application of Au@polyphenol-metal nanocomposite  
synthesized by a facile and green method

### **Supplementary Information**

**Tao Zeng,<sup>a</sup> Xiaole Zhang,<sup>a,b</sup> Yuanyuan Guo,<sup>a</sup> Hongyun Niu,<sup>a</sup> and Yaqi Cai<sup>\*a</sup>**

*<sup>a</sup> The State Key Laboratory of Environmental Chemistry and Ecotoxicology of  
Research Center for Eco-Environmental Sciences, Chinese Academy of Sciences,  
Beijing 100085, China; E-mail: caiyaqi@rcees.ac.cn*

*<sup>b</sup> College of Life Science, Hebei United University, Tangshan, 063000, Hebei, China.*

## EXPERIMENTAL SECTION

### Chemicals

Hydrogen tetrachloroaurate hydrate ( $\text{HAuCl}_4 \cdot 4\text{H}_2\text{O}$ ), ferric chloride hexahydrate ( $\text{FeCl}_3 \cdot 6\text{H}_2\text{O}$ ), 2-amino-2-hydroxymethylpropane-1,3-diol (Tris), 4-nitrophenol (4-NP), and sodium hydride ( $\text{NaBH}_4$ ) were purchased from Sinopharm Chemistry Reagent Co. Ltd. (Beijing, China). Tannic acid (TA), (-)-Epigallocatechin gallate (EGCG), and gallic acid (GA) were obtained from Sigma-Aldrich. All chemicals were used as received without further purification. Ultrapure water was prepared in the laboratory using a Milli-Q SP reagent water system from Millipore (Milford, MA).

### Synthesis of core-shell Au@polyphenol-Fe nanocatalyst

Au NPs were first prepared by simply mixing 1 mL of  $\text{HAuCl}_4 \cdot 4\text{H}_2\text{O}$  (1 mM) with 5  $\mu\text{L}$  of TA (40  $\text{mg mL}^{-1}$ ) at room temperature. The suspension was vigorously mixed by a vortex mixer until the solution color changed red and kept constant. The obtained Au NPs were collected by centrifugation (10000  $\text{r min}^{-1}$ ) and washed with water to remove excess TA. To fabricate Au@polyphenol-Fe nanocatalyst, 10  $\mu\text{L}$  of  $\text{FeCl}_3 \cdot 6\text{H}_2\text{O}$  (1  $\text{mg mL}^{-1}$ ) was added into the 0.5 mL of Au NPs solution with a 30 s of vigorous mixing, followed by the addition of 10  $\mu\text{L}$  of TA (4  $\text{mg mL}^{-1}$ ) with another 30 s mixing. After mingling of the above mixture with 0.5 mL Tris-HCl (pH = 8.5), the products were recovered by centrifugation and rinsed with water two times. The layer thickness can be controlled by selectively repeating the above cycle. For the assembly of other polyphenols-Fe layers, the synthetic procedures were same as described above except that EGCG and GA were used in place of TA at same concentration.

### Catalytic reduction of 4-NP

The reduction of 4-NP in the presence of  $\text{NaBH}_4$  was carried out to investigate the catalytic activity of the catalyst. Typically, 2 mL of deionized water, 1.0 mL of fresh  $\text{NaBH}_4$  (0.2 M), and 0.1 mL 4-NP (5 mM) were added into a quartz cuvette in sequence, followed by the addition of 0.05 mL of catalyst (2 mM Au) to the mixture. The reaction progress was monitored by UV-vis spectroscopy at a certain time interval to obtain the successive information. When conduct the pH-dependent experiments, various buffer systems were applied to adjust the pH value: pH  $\sim$  2, glycine - HCl (0.2 M); pH  $\sim$  5.0,  $\text{Na}_2\text{HPO}_4$  (0.2 M) - citric acid (0.1 M); pH  $\sim$  8.5, Tris - HCl (10 mM).

### Characterization

The size and morphology of the synthesized materials were surveyed by H-7500 transmission electron microscope (TEM, Tokyo, Japan) and Tecnai G2 F20 HRTEM with an energy dispersive X-ray spectrometry (HRTEM-EDX, FEI, Netherlands). X-Ray photoelectron spectroscopy (XPS) measurements were conducted by applying a Thermo Scientific ESCA-Lab-200i-XL spectrometer (Waltham, MA) with monochromatic Al  $K\alpha$  radiation (1486.6 eV). Zeta-potential measurements were conducted in water by using a Zetasizer Nano ZS (Malvern). UV-vis absorption tests were carried out on a 4802S UV-vis spectrophotometer (Shanghai Unico, China).

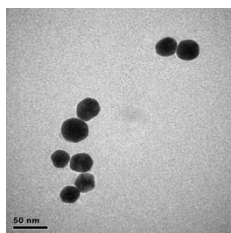

**Fig. S1** TEM image of bare Au NPs.

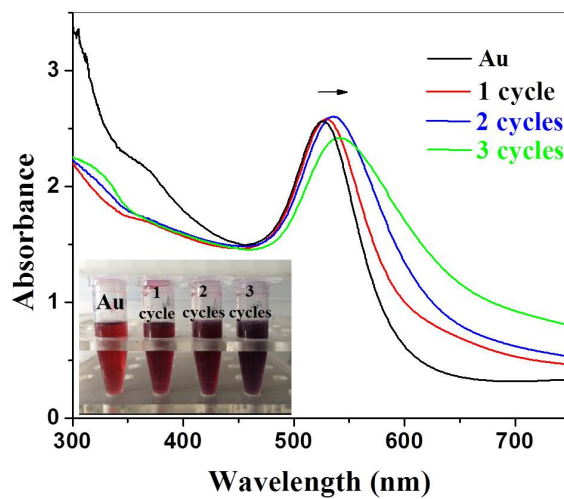

**Fig. S2** UV-vis spectra of bare Au NPs, Au@TA-Fe composites with 1, 2, and 3 assembly cycles. The inset shows the color of the corresponding solution.

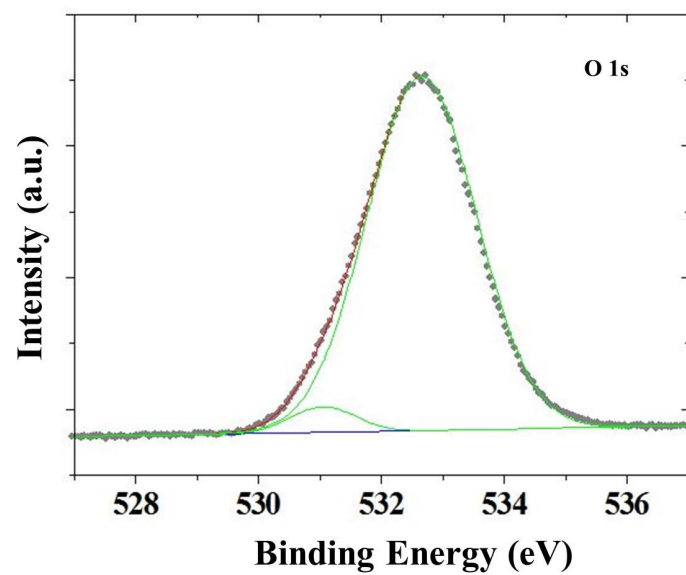

Fig. S3 XPS spectrum of O 1s core-level.

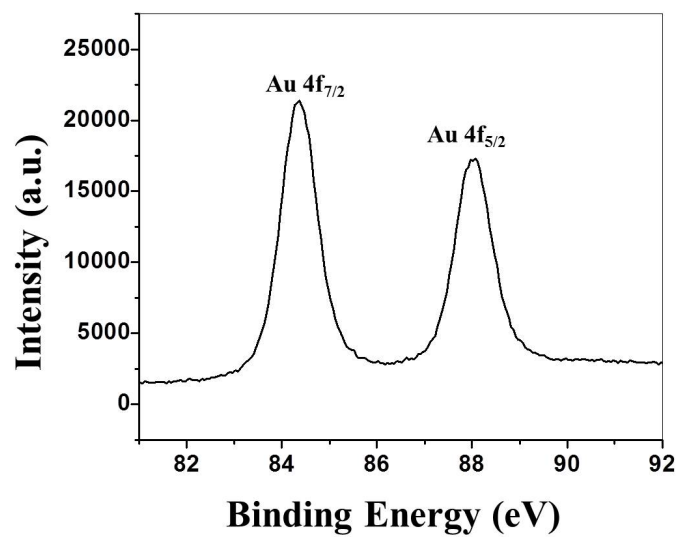

Fig. S4 XPS spectrum of Au 4f core-level.

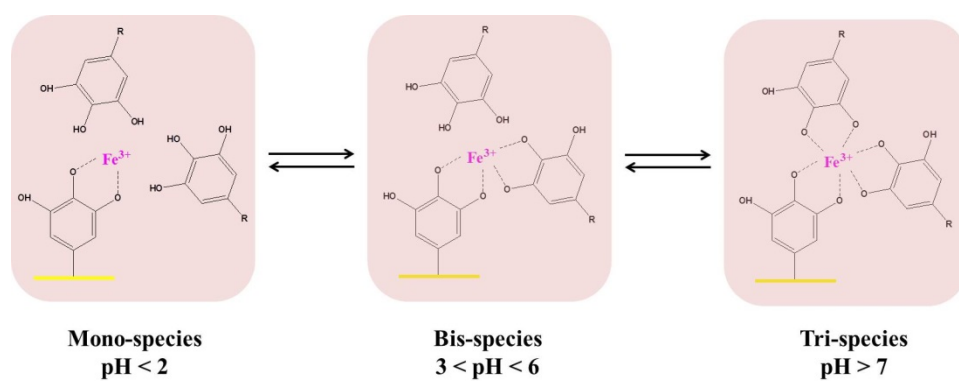

**Fig. S5** pH-responsive character of TA- $\text{Fe}^{3+}$  layer.

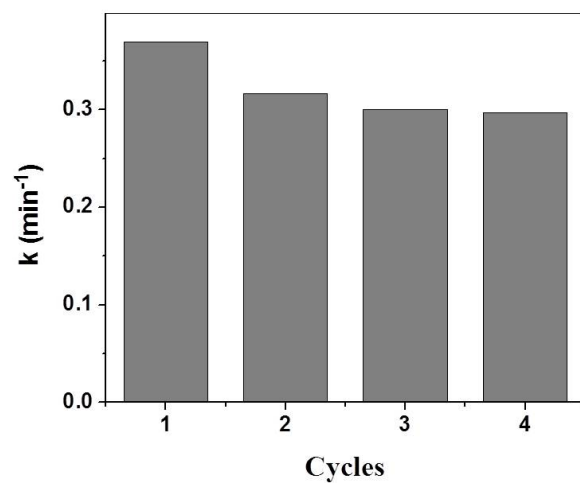

**Fig. S6** Rate constant  $k$  of different reuse cycle.

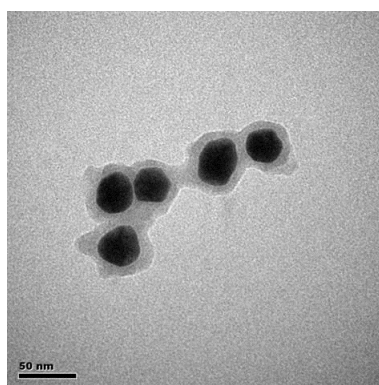

**Fig. S7** TEM image of Au@TA-Fe nanocatalyst after used.

**Table S1** Comparison of catalytic activity for 4-NP reduction by Au based nanocatalysts

| Catalyst structure                                                     | $k$ (min <sup>-1</sup> ) | $k_{nor}$ (min <sup>-1</sup> μmol <sup>-1</sup> ) | Ref. No.  |
|------------------------------------------------------------------------|--------------------------|---------------------------------------------------|-----------|
| Au NPs/SiO <sub>2</sub> -NTs                                           | 0.64                     | 0.638                                             | 1         |
| Au NPs@[Na]-HAMS                                                       | 0.31                     | -                                                 | 2         |
| AuNPs/Fe <sub>3</sub> O <sub>4</sub> -NPs                              | 0.01                     | 0.36                                              | 3         |
| Fe <sub>3</sub> O <sub>4</sub> @SiO <sub>2</sub> -Au@mSiO <sub>2</sub> | 0.35                     | 1.05                                              | 4         |
| Au NPs/TWEEN/GO                                                        | 0.25                     | 1.16                                              | 5         |
| Au NPs/GO                                                              | 0.18                     | -                                                 | 6         |
| Au@MIL-100(Fe)                                                         | 0.33                     | -                                                 | 7         |
| Au-EGCG-CF                                                             | 0.14                     | 0.14                                              | 8         |
| Dumbbell-like Fe <sub>3</sub> O <sub>4</sub> -Au                       | 0.63                     | 0.33                                              | 9         |
| PLAL-AuNPs/CeO <sub>2</sub> -NTs                                       | 0.14                     | 0.84                                              | 10        |
| Au@TA-Fe                                                               | 0.37                     | 3.7                                               | This work |

#### References:

- [1] Z. Y. Zhang, C. L. Shao, P. Zou, P. Zhang, M. Y. Zhang, J. B. Mu, Z. C. Guo, X. H. Li, C. H. Wang and Y. C. Liu, *Chem. Commun.*, 2011, 47, 3906-3908.
- [2] X. Fang, Z. Liu, M.-F. Hsieh, M. Chen, P. Liu, C. Chen, N. Zheng, *ACS Nano* 2012, 6, 4434.
- [3] Y. C. Chang and D. H. Chen, *J. Hazard. Mater.*, 2009, 165, 664-669.
- [4] Y. H. Deng, Y. Cai, Z. K. Sun, J. Liu, C. Liu, J. Wei, W. Li, C. Liu, Y. Wang, D. Y. Zhao, *J. Am. Chem. Soc.* 2010, 132, 8466.
- [5] Y. W. Zhang, S. Liu, W. B. Lu, L. Wang, J. Q. Tian and X. P. Sun, *Catal. Sci. Technol.*, 2011, 1, 1142
- [6] W. B. Lu, R. Ning, X. Y. Qin, Y. W. Zhang, G. H. Chang, S. Liu, Y. L. Luo and X. P. Sun, *J. Hazard. Mater.*, 2011, 197, 320
- [7] F. Ke, J. F. Zhu, L. G. Qiu and X. Jiang, *Chem. Commun.*, 2013, 49, 1267-1269.
- [8] H. Wu, X. Huang, M. M. Gao, X. P. Liao, B. Shi, *Green Chem.*, 2011, 13, 651.
- [9] F. H. Lin, R. A. Doong, *J. Phys. Chem. C* 2011, 115, 6591.
- [10] J. M. Zhang, G. Z. Chen, M. Chaker, F. Rosei and D. L. Ma, *Appl. Catal. B-environ*, 2013, 132, 107-115.
